# Supplementary material
Source: MDPI journal article supplement (https://www.mdpi.com/2073-4433/10/12/763)
Supplement: s1 [file s1]

## Supplementary Information

**Table S1** Ventilation conditions in the studied classroom during the field campaign. ON is when the ventilation was working, OFF is when it was stopped. ON/W is when the ventilation worked and windows were opened, and OFF/W is when it was shut down with opened windows. Black font is for working ventilation, green is when it is not working and red is to indicate the windows opening.

| Date\Hour  | 05:10 | 08:10 | 09:45 | 10:10 | 11:45 | 13:30 | 15:10 | 15:20 | 16:15 | 17:10 | 17:15 | 17:20 | 18:10 | 18:57 | 20:10 |
|------------|-------|-------|-------|-------|-------|-------|-------|-------|-------|-------|-------|-------|-------|-------|-------|
| 25/02/2015 | OFF   | ON    | OFF   | ON    | ON    | ON    | OFF   | ON    | ON    | ON    | ON    | OFF   | OFF   | OFF   | OFF   |
| 26/02/2015 | OFF   | ON    |
| 27/02/2015 | OFF   | ON    | ON/W  | ON/W  | ON/W  | ON/W  | ON    | ON    | OFF   |
| 28/02/2015 | OFF   | ON    | ON/W  | ON/W  | ON/W  | ON    | ON    | ON    | ON    |
| 01/03/2015 | ON    | OFF   | OFF/W | OFF/W | OFF   |
| 02/03/2015 | OFF   | ON    | OFF   | ON    | OFF   | ON    | ON    | ON    | ON    | ON    | ON    | OFF   | OFF   | OFF   | OFF   |
| 03/03/2015 | OFF   | ON    | OFF   | ON    | OFF   | ON    | ON    | ON    | ON    | ON    | ON    | OFF   | OFF   | OFF   | OFF   |
| 04/03/2015 | OFF   | ON    | OFF   | ON    | OFF   | ON    | ON    | ON    | ON    | ON    | ON    | OFF   | OFF   | OFF   | OFF   |

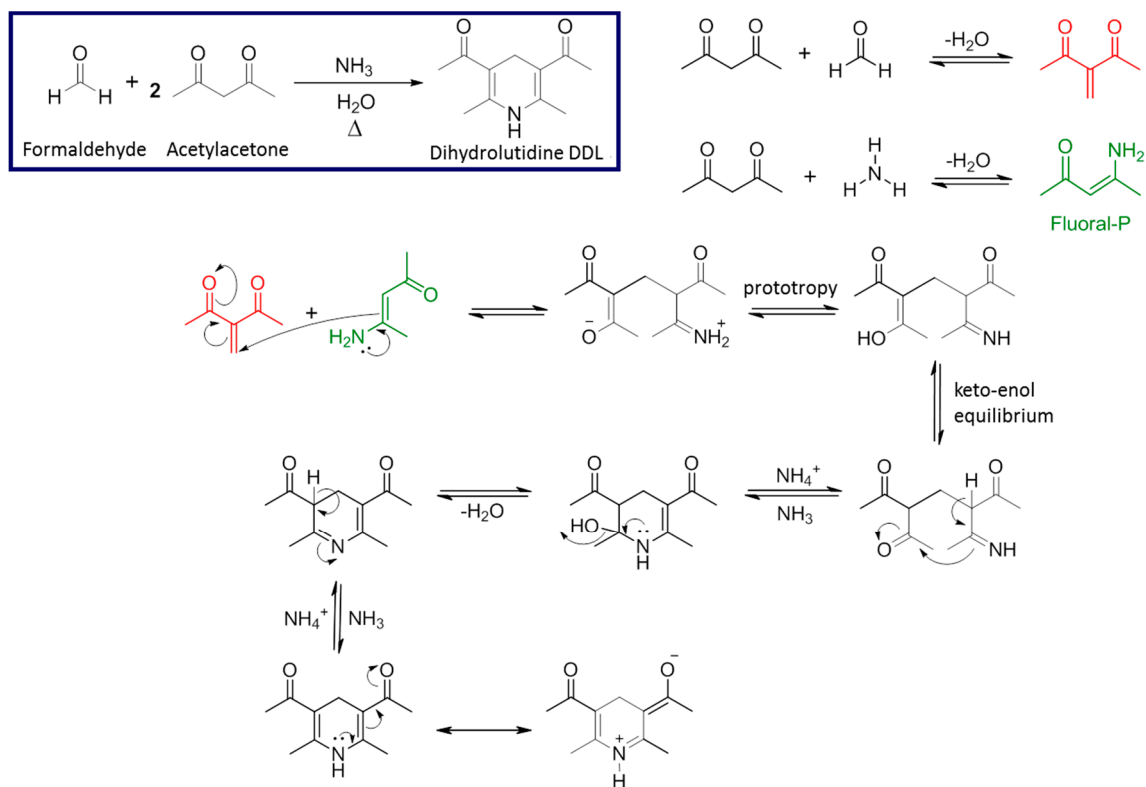

**Figure S1:** Balance chemical reaction for the reaction between formaldehyde and acetylacetone, producing dihydropyridine (DDL).

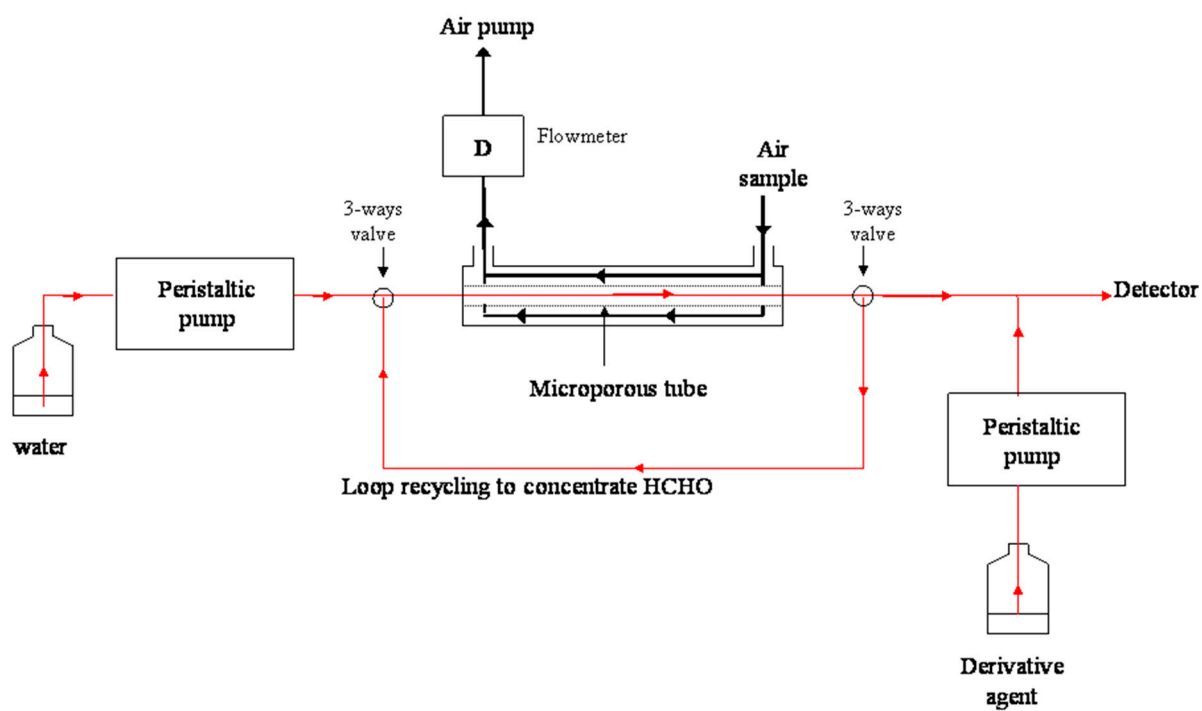

Figure S2: Schematic diagram of the formaldehyde uptake used for the first generation of formaldehyde analyser.

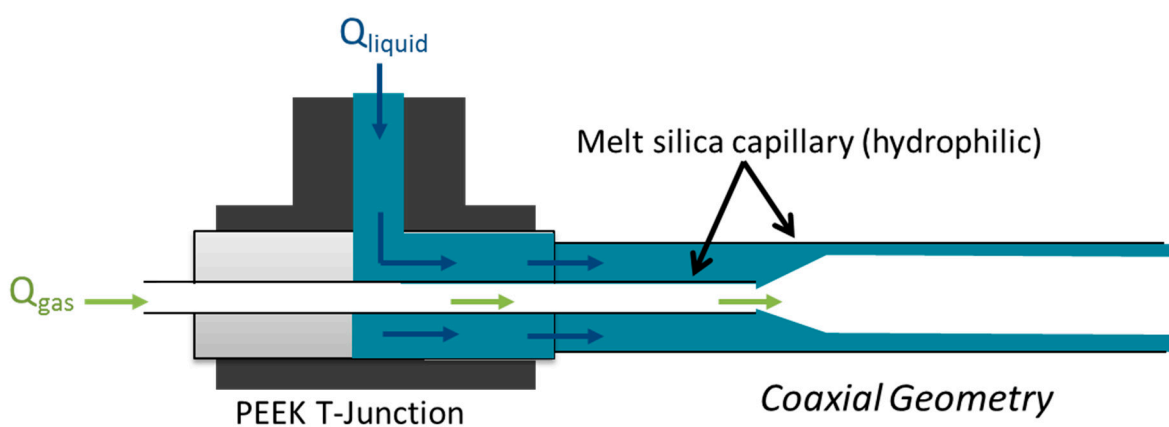

**Figure S3:** Scheme of the microfluidic cell, to obtain an annular flow.

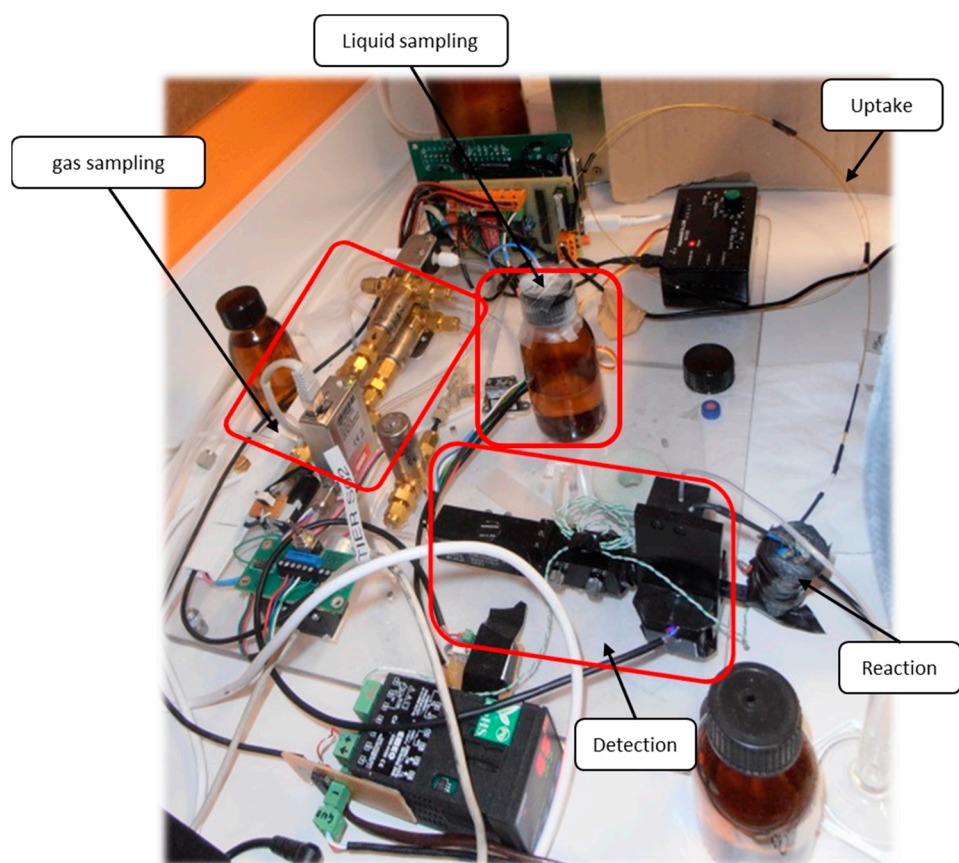

**Figure S4:** Picture of the formaldehyde micro-analyser prototype, during the field MERMAID campaign.

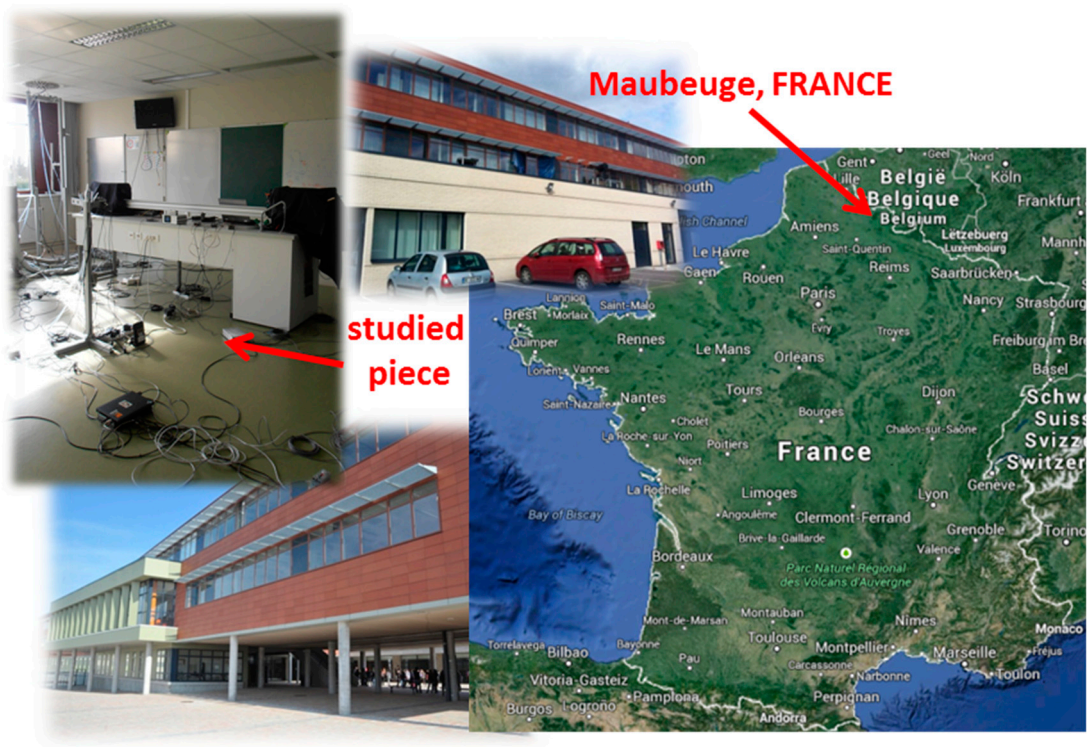

**Figure S5:** Picture of the VHEP College Vauban in Maubeuge (North, France).

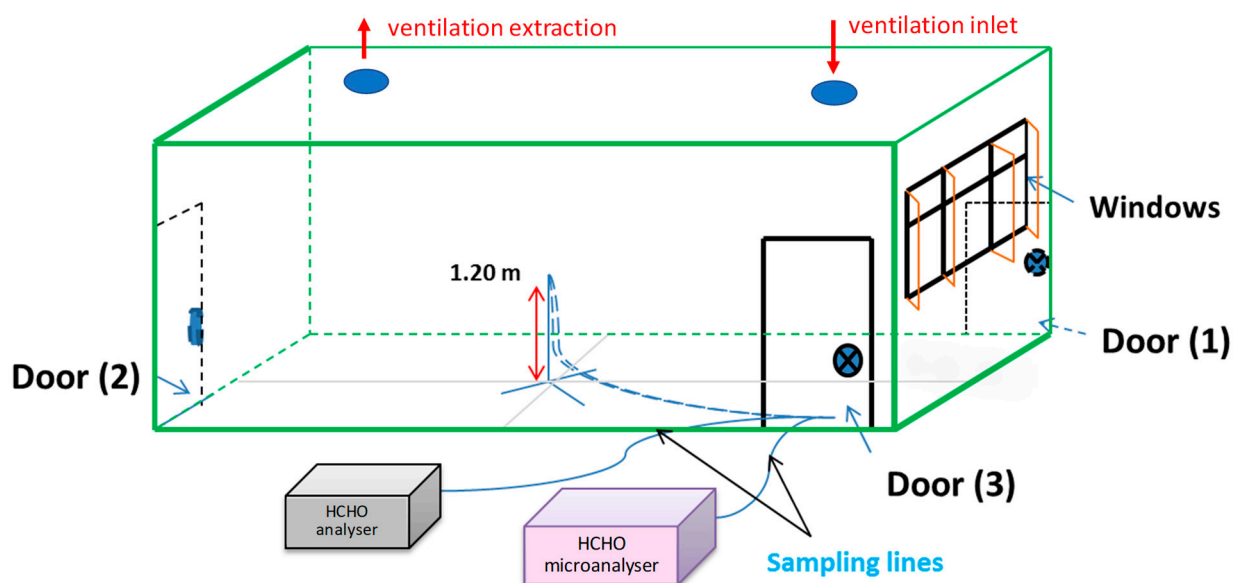

**Figure S6:** Schematic diagram of the chosen room investigated in this work. Instruments were installed in an adjacent room. Sampling was carried out using  $\frac{1}{4}$ " Teflon tubes via door 3. All sampling lines were placed at the same point in the studied room at 1.20 m above the ground.

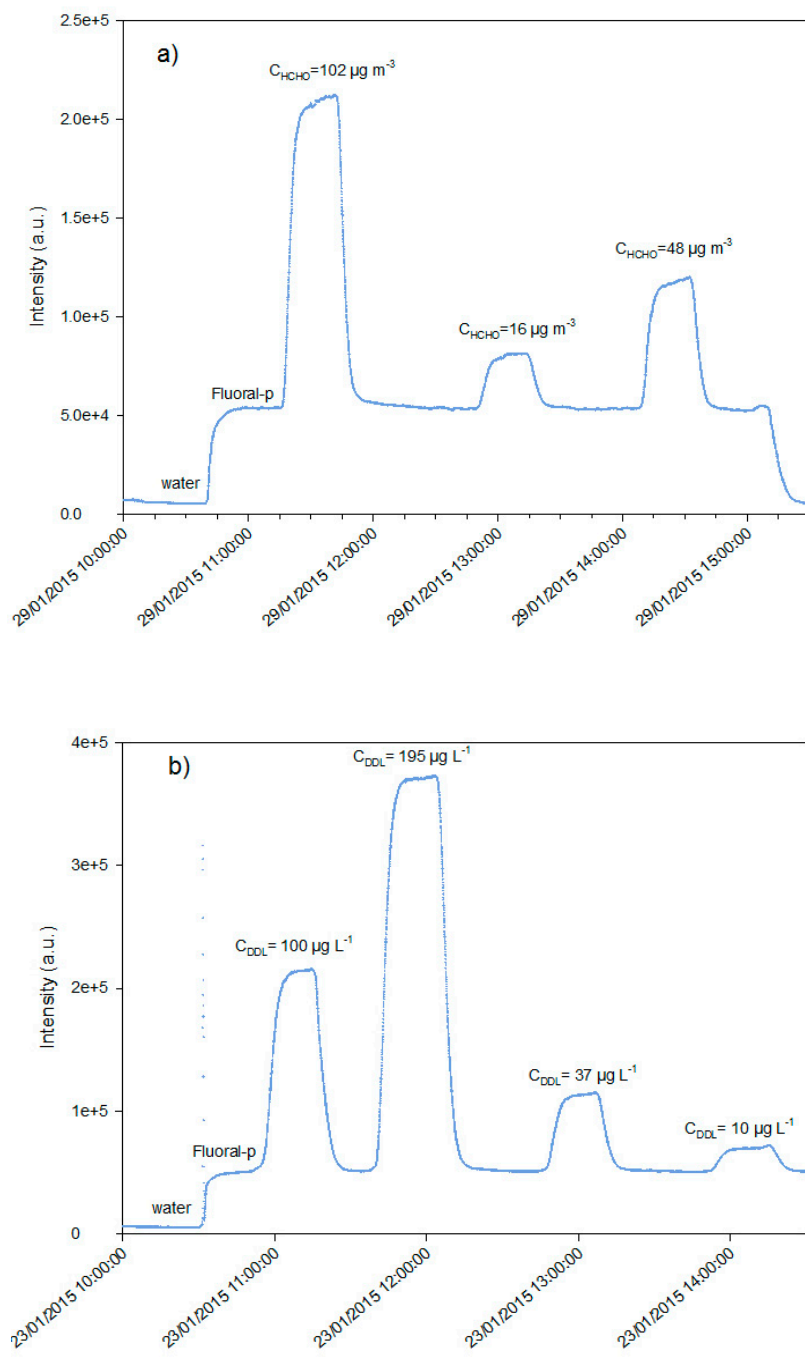

**Figure S7:** Raw signal obtained with the formaldehyde micro-analyser for a) gaseous formaldehyde concentration in the range 16-102  $\mu\text{g m}^{-3}$  and b) liquid formaldehyde concentration in the range 20-397  $\mu\text{g L}^{-1}$  corresponding to 10-195  $\mu\text{g L}^{-1}$  for the detection product, using pure air (to replace gaseous formaldehyde) to obtain an annular flow, with gas and liquid flow rate of 20  $\text{mL min}^{-1}$  and 17  $\mu\text{L min}^{-1}$  respectively.



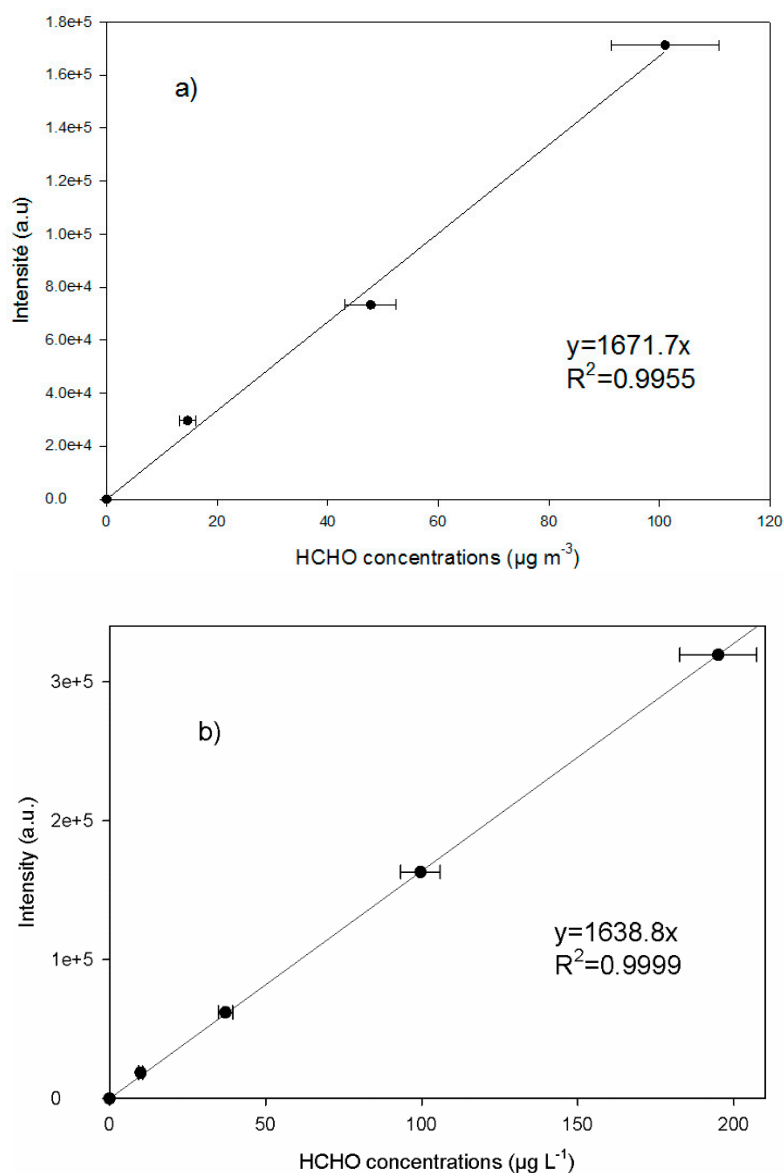

**Figure S8:** Calibration curves obtained with the formaldehyde micro-analyser with gas and liquid flow of 20 mL min<sup>-1</sup> and 17 µL min<sup>-1</sup> respectively for a) gaseous formaldehyde concentrations in the range 14-105 µg m<sup>-3</sup>; horizontal bars represent the uncertainties of gaseous formaldehyde concentrations which are determined using the uncertainties of DNPH gaseous sampling volumes and HPLC/UV analyses (cartridges desorption, dilution and error on the calibration curve) and b) liquid formaldehyde concentrations in the range 10-195 µg L<sup>-1</sup> using pure air (to replace gaseous formaldehyde) to obtain an annular flow; horizontal bars represent the uncertainties of liquid formaldehyde concentrations which are calculated using the mass uncertainties related to solutions preparation.

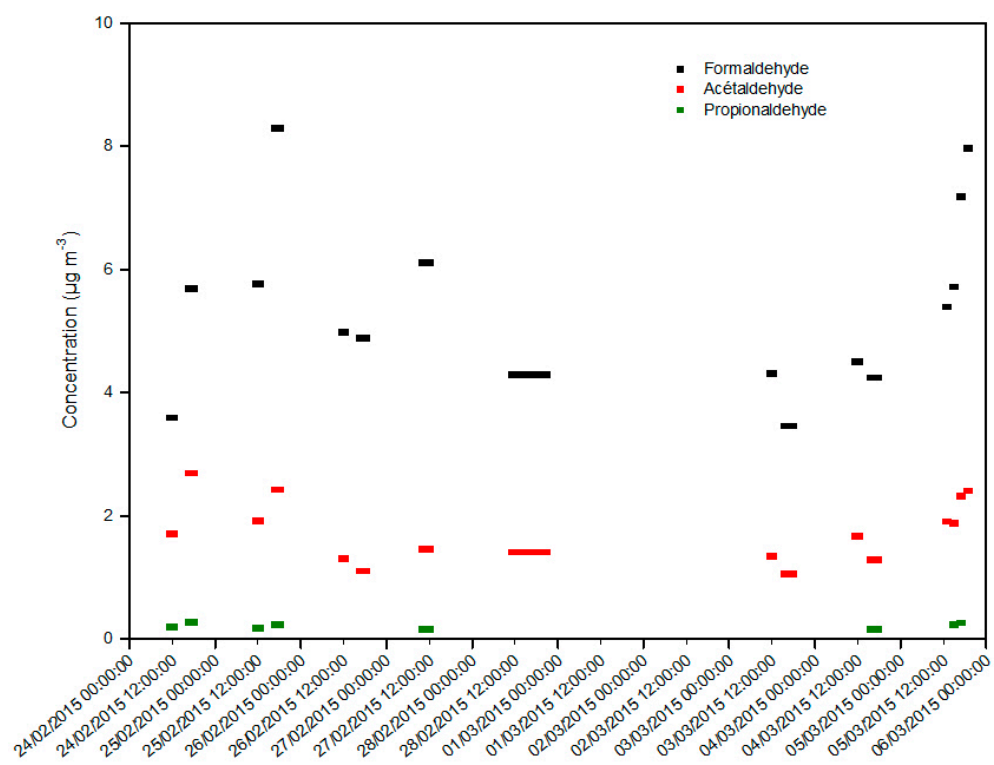

**Figure S9:** Variation of gaseous aldehydes concentrations measured at the ventilation inlet, for 11 days, using the reference ISO 16000-3 method.
